# Supplementary material for: Predictive Value of Serum IFN-γ inducible Protein-10 and IFN-γ/IL-4 Ratio for Liver Fibrosis Progression in CHB Patients
Source: PubMed Central journal article supplement (PMC5220308; doi:10.1038/srep40404), 2017-01-09
Supplement: srep40404-s1.pdf [file srep40404-s1.pdf]

## **Predictive Value of Serum IFN- $\gamma$ inducible Protein-10 and IFN- $\gamma$ /IL-4 Ratio for Liver Fibrosis Progression in CHB Patients**

Yadong Wang<sup>1</sup>, Weiyang Yu<sup>1</sup>, Chuan Shen<sup>1</sup>, Wei Wang<sup>1</sup>, Li Zhang<sup>1</sup>, Fang Liu<sup>1</sup>, Hui Sun<sup>1</sup>, Yajuan Zhao<sup>2</sup>, Honghao Che<sup>3</sup>, Caiyan Zhao<sup>1\*</sup>

### **Suppl. figure legends**

**Suppl. Figure 1. Intrahepatic IP-10 expression.** Representative micrographs of serial liver tissue sections from the four groups of CHB patient samples: F0 (a), F1–2 (b), F3–4 (c), and F5–6 (d). Magnifications: 200 $\times$

**Suppl. Figure 2. Intrahepatic IFN- $\gamma$  expression.** Representative micrographs of serial liver tissue sections from the four groups of CHB patient samples: F0 (a), F1–2 (b), F3–4 (c), and F5–6 (d). Magnifications: 200 $\times$

**Suppl. Figure 3. Intrahepatic IL-4 expression.** Representative micrographs of serial liver tissue sections from the four groups of CHB patient samples: F0 (a), F1–2 (b), F3–4 (c), and F5–6 (d). Magnifications: 400 $\times$

**Suppl. Figures**

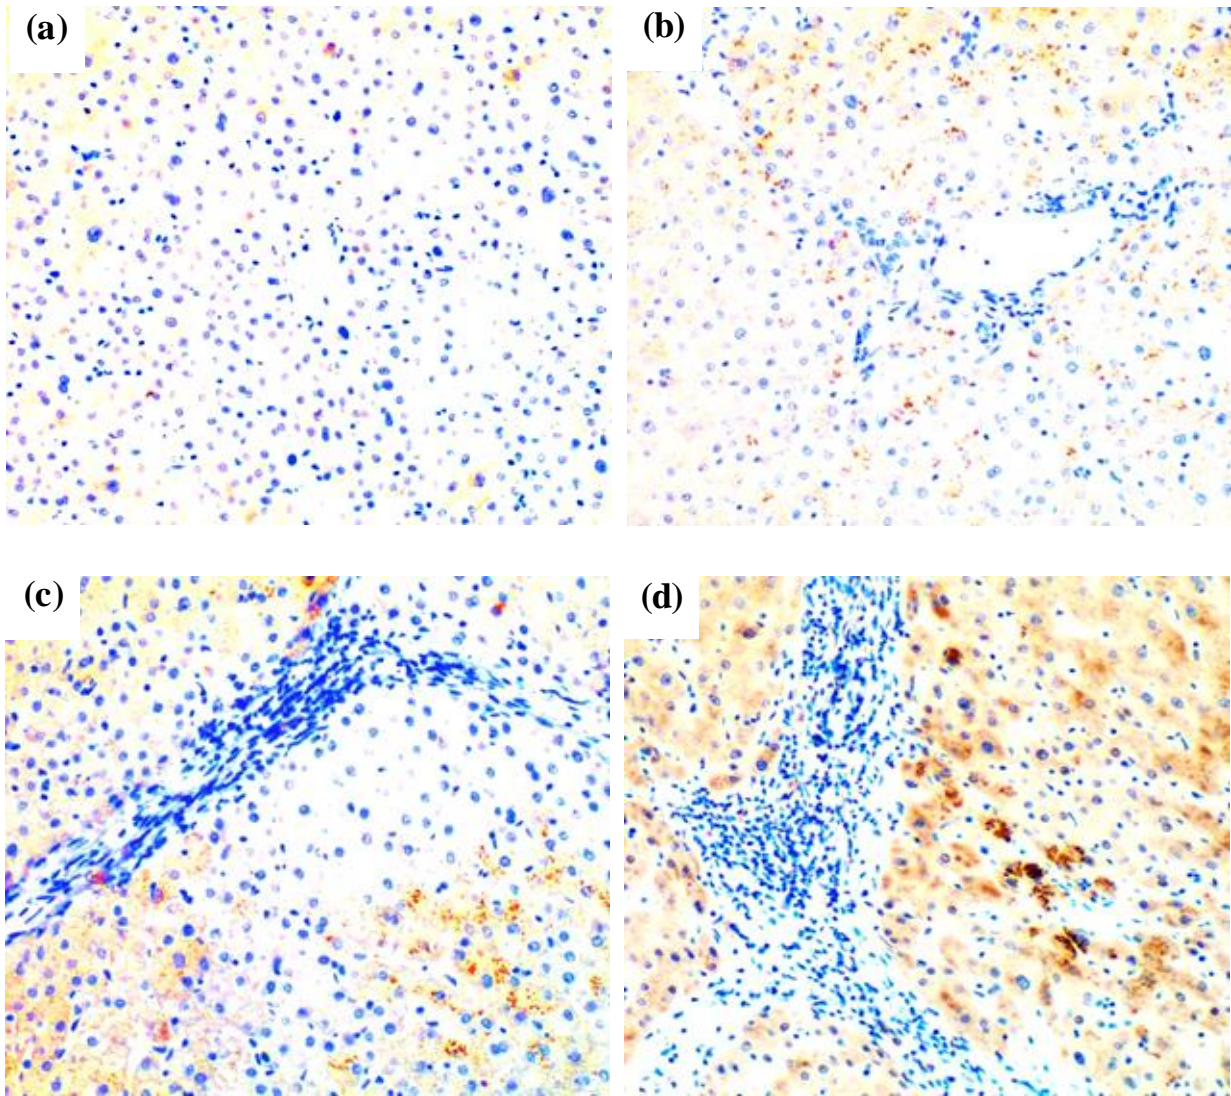

**Suppl. Figure 1 Intrahepatic IP-10 expression**

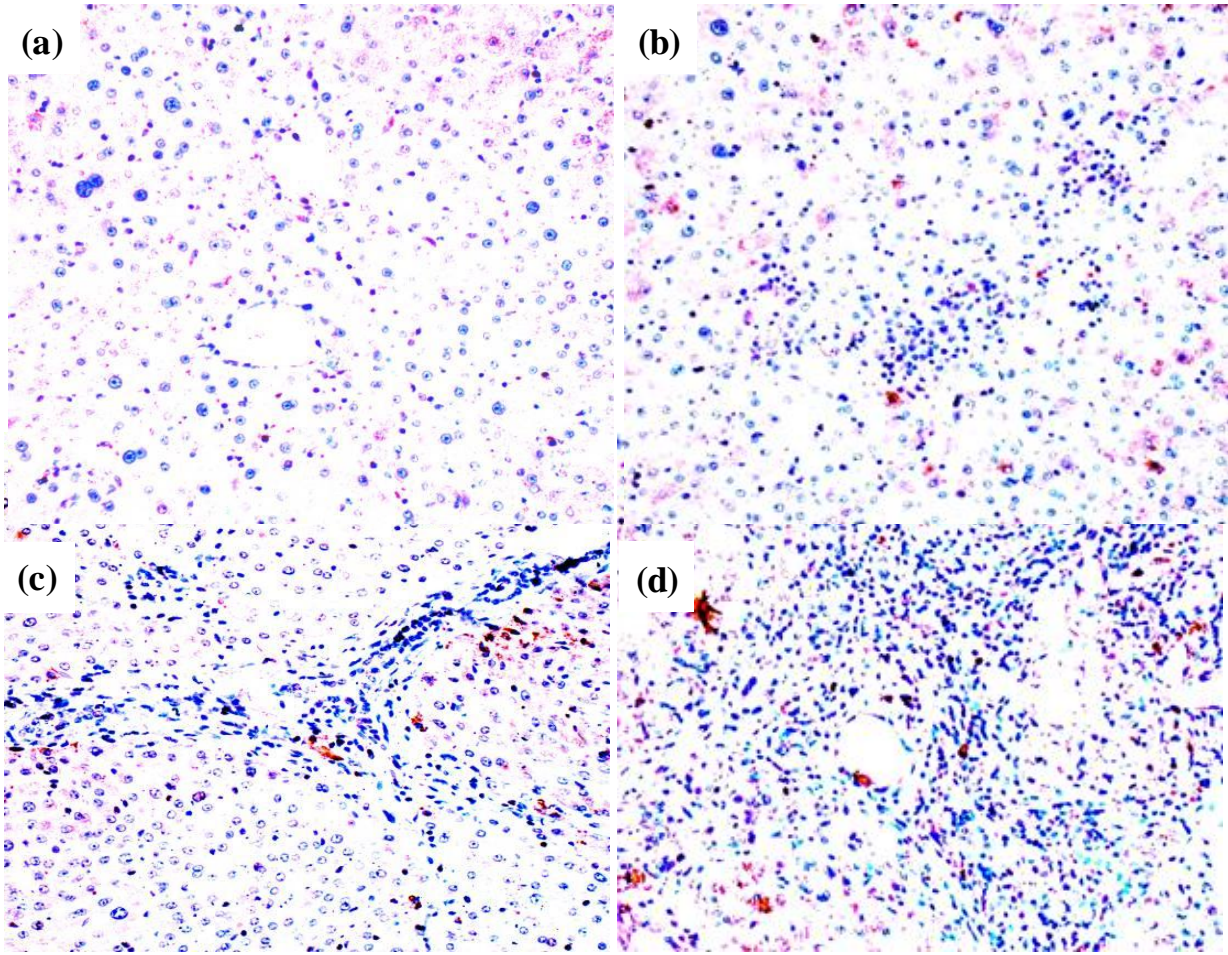

**Suppl. Figure 2 Intrahepatic IFN- $\gamma$  expression**

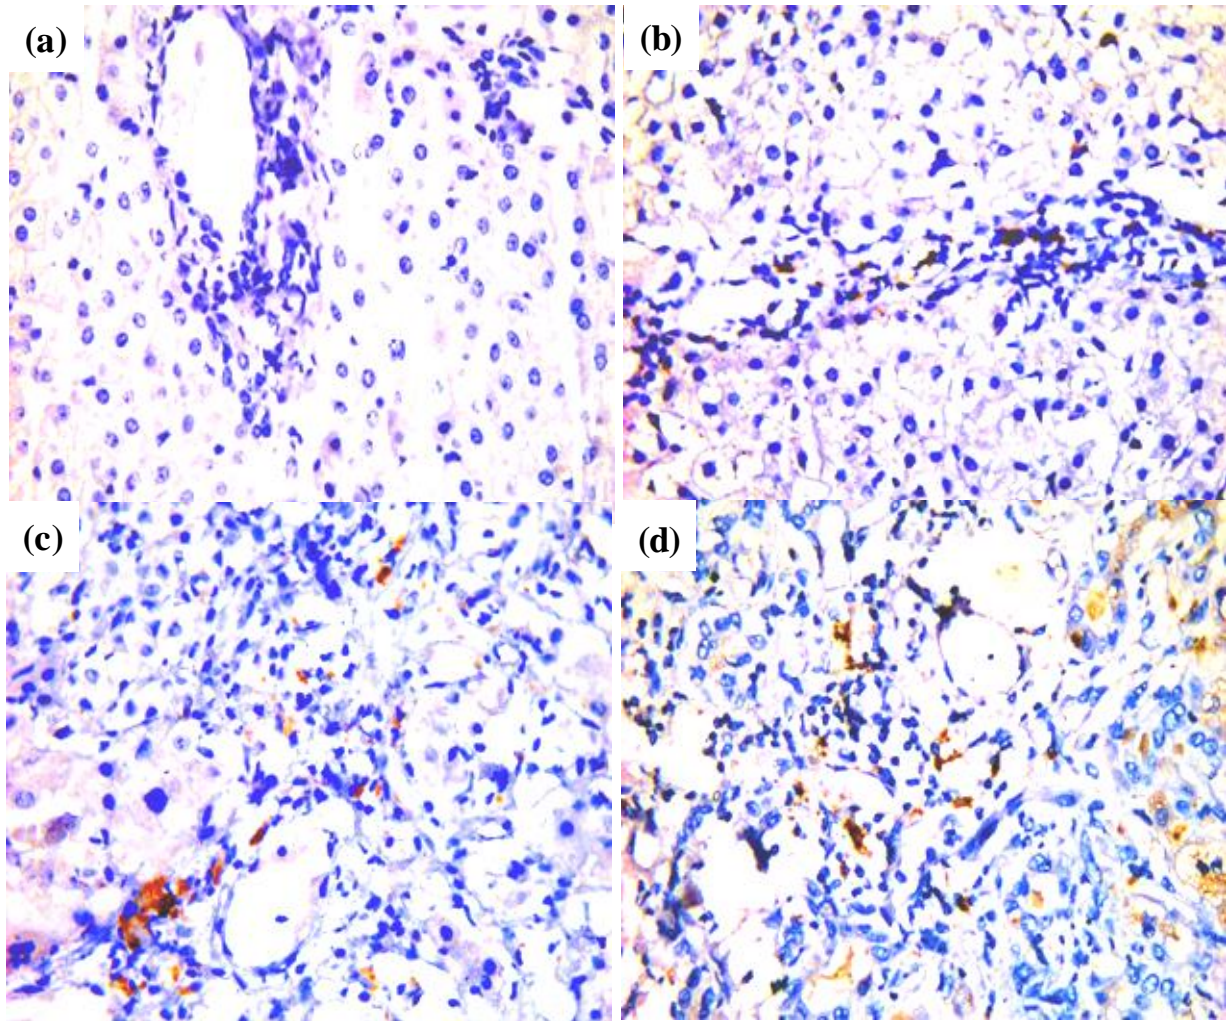

**Suppl. Figure 3 Intrahepatic IL-4 expression**
